# Supplementary material for: Alcohol consumption among university students in Ethiopia: a systematic review and meta-analysis of epidemiological studies
Source: Frontiers journal article supplement (doi:10.3389/fpubh.2025.1513242), 2025-09-09
Supplement: Table_3.xlsx [file Table_3.xlsx]

## Sheet: current-prev
Authors	Authors(year)	years	Country	prevalence	prop1	satot	male	LCI	UCI	Friend currently drinks alcohol	LCI	UCI	Family’s drinks alcohol	LUI	UCI	Khat use	LUI	UCI	Cigarette	LCI	UCI	urban	LCI	UCI	Pocket Money	LCI	UCI	Family’s cigaresmoking	LUI	UCI	Friends’s cigaresmoking
Chekole	Chekole (2020)	2020	Ethiopia	24.4	213.744	876	0.93	0.66	1.31	1.53	1.09	2.1	1.29	0.89	1.86	1.48	1.05	2.09	1.76	1.09	2.84
Deressa et al	Deressa et al (2011)	2011	Ethiopia	4.5	28.44	632	2.14	1.22	3.76	2.47	1.5	4.08	2.6	1.51	4.51	15.11	4.24	53.91	8.65	3.48	21.5	0.94	0.32	2.76
Teshome et al	Teshome et al (2013)	2013	Ethiopia	26.5	731.4	2760	0.859	0.66	1.12	1.811	1.305	2.513	1.088	0.83	1.44										1.46	1.12	1.89	1.115	0.739	1.683	1.045
Gebeyehu et al	Gebeyehu et al (2021)	2021	Ethiopia	0.397	2.53683	639	1.8	1.24	2.6							4.69	0.89	24.7				1.16	0.72	1.87
Gebreslassie et al	Gebreslassie et al (2021)	2021	Ethiopia	9.3	71.052	764	2.12	1.35	3.32	14	8.09	24.24	2.61	1.56	4.34	2.16	1.28	3.66	8.16	3.35	19.85
Birhanu	Birhanu A (2016)	2016	Ethiopia	26.1	114.84	440	2.26	1.27	4.03	5.22	2.63	10.39	7.83	4.64	13.2
Dida et al	Dida et al (2014)	2014	Ethiopia	23.6	142.308	603
Mohammed	Mohammed (2014)	2014	Ethiopia	10.9	23.98	220
Koura et al	Koura et al (2017)	2017	Burkinafaso	24.3	87.966	362				2.8	1.3	5.8	8.3	4.9	14
Yismaw et al	Yismaw et al (2015)	2015	Ethiopia	26.4	119.856	454				13.12	10.6	15.7				1.18	0.51	2.73	2.932	0.77	11.2
Gebremariam et al	Gebremariam et al (2018)	2018	Ethiopia	17	118.15	695
Aklog et al	Aklog et al (2013)	2013	Ethiopia	13.4	56.682	423
Kumburi et al	TSegay et al (2014)	2014	Ethiopia	45	557.55	1239	2.62	1.26	4.32	1.69	1.29	6.85	1.24	1.17	2.34													12	10.36	14.73
Aboagye et al	Kumburi et al (2017)	2017	Ghana	19.4	81.092	418	0.89	0.61	1.31							3.1	0.96	12.14				1.35	0.93	1.95
Tesfaye et al	Aboagye et al (2021)	2021	Ethiopia	20	208	1040	1.11	0.75	1.85
Kassa et al	Tesfaye et al (2014)	2014	Ethiopia	29.5	174.05	590
Birhanu et al	Kassa et al (2016)	2016	Ethiopia	40.9	279.756	684	1.8	1.1	3				1.2	0.7	2
Shiferaw et al	Reda et al (2012)	2012	Ethiopia	18.3	118.584	648	2.09	1.45	3	10.09	6.84	14.89	2.77	1.89	4.07
Derese et al	Birhanu et al (2014)	2014	Ethiopia	17.5	133.7	764
Desta et al	Shiferaw et al (2017)	2017	Ethiopia	24.2	45.496	188	71.91	21.76	237.69	33.25	11	100				2.78	1.15	6.83	4.45	1.04	19.08
Razanamihaja et al	Derese et al (2014)	2014	Madagascar	12.4	93	750
Darteh	Desta et al (2018)	2018	Mozambique	13.8	264.684	1918
Peltzer et al	Razanamihaja et al (2013)	2013	Namibia	28.2	1277.74	4531	2.56	1.389	4.73				3.69	1.423	4.73							8.41	2.349	30.1
Ajayi et al	Darteh (2021)	2021	Nageria	31.1	248.8	800	1.1	0.77	1.56	1.28	0.6	2.72							7.73	3	19.92
Kumesa et al	Peltzer et al (2018)	2018	Ethiopia	35.6	126.38	355	1.18	0.96	1.43
kimoi	Ajayi et al (2019)	2019	Tanzania	13.5	36.045	267	1.59	1.16	2.17
Hagos et al	Shibiru et al (2023)	2023	Ethiopia	12	32.52	271	1.22	0.67	2.22	1.74	0.92	3.3	0.19	0.07	0.51	2.185	0.54	8.86	0.426	0.104	1.74	1.674	0.96	2.91
Adere et al	Kumesa et al (2015)	2015	Ethiopia	27.9	203.67	730

## Sheet: lifetime
Authors(year)	Authors	years	yearscat	Country	Countrycat	typestude	typestudecat	study design	sampling	samplingcat	lifetimalco	lifetimepr	prop2	satot
Chekole (2020)	Chekole	2020	2015 and after	Ethiopia	Ethiopia	University student	University	Cross-sectional	SyteRS	Others	336	41.8	366.168	876
Deressa et al (2011)	Deressa et al	2011	Before 2015	Ethiopia	Ethiopia	University student	University	Cross-sectional	Notavaliable	Others	195	31.4	198.448	632
Gebreslassie et al (2021)	Gebreslassie et al	2021	Before 2015	Ethiopia	Ethiopia	University student	University	Cross-sectional	multi- stage sampling technique	multi-sage	261	34.5	263.58	764
Birhanu A (2016)	Birhanu A	2016	2015 and after	Ethiopia	Ethiopia	University student	University	Cross-sectional	SRS	Others	223	50.7	223.08	440
Gebremariam et al (2018)	Gebremariam et al	2018	2015 and after	Ethiopia	Ethiopia	University student	University	Cross-sectional	stratified sampling	multi-sage	224	36.3	252.285	695
TSegay et al (2014)	TSegay et al	2014	Before 2015	Ethiopia	Ethiopia	University student	University	Cross-sectional	multi-sage	multi-sage	280	35	295.75	845
Kumburi et al (2017)	Kumburi et al	2017	2015 and after	Ethiopia	Ethiopia	University student	University	Cross-sectional	SyteRS	Others	558	60	743.4	1239
Tesfaye et al (2014)	Tesfaye et al	2014	Before 2015	Ethiopia	Ethiopia	University student	University	Cross-sectional	multi-sage	multi-sage	513	50.2	522.08	1040
Kassa et al (2016)	Kassa et al	2016	2015 and after	Ethiopia	Ethiopia	University student	University	Cross-sectional	multi-sage	multi-sage	285	48.7	287.33	590
Shiferaw et al (2017)	Shiferaw et al	2017	2015 and after	Ethiopia	Ethiopia	University student	University	Cross-sectional	multi-sage	multi-sage	164	27.3	176.904	648
Derese et al (2014)	Derese et al	2014	Before 2015	Ethiopia	Ethiopia	University student	University	Cross-sectional	SRS	Others	302	41.7	318.588	764
Desta et al (2018)	Desta et al	2018	2015 and after	Ethiopia	Ethiopia	University student	University	Cross-sectional	Census	Others	49	26.34	49.5192	188
Kumesa et al (2015)	Kumesa et al	2015	2015 and after	Ethiopia	Ethiopia	College student	Others	Cross-sectional	SRS	Others	140	40.2	142.71	355
Hagos et al (2016)	Hagos et al	2016	2015 and after	Ethiopia	Ethiopia	University student	University	Cross-sectional	SRS	Others	68	25.1	68.021	271
Adere et al (2017)	Adere et al	2017	2015 and after	Ethiopia	Ethiopia	University student	University	Cross-sectional	multi-sage	multi-sage	217	33.1	241.63	730

## Sheet: factors 2
Variables	Author	Year	country	syampling	OR	LCI	UCI
Cigarette	Chekole	2020			1.76	1.09	2.84
Cigarette	Deressa et al	2011			8.65	3.48	21.5
Cigarette	Gebreslassie et al	2021			8.16	3.35	19.85
Cigarette	Yismaw et al	2015			2.932	0.77	11.2
Cigarette	Shiferaw et al	2017			4.45	1.04	19.08
Cigarette	Darteh	2021			7.73	3	19.92
Cigarette	Shibiru et al	2023			0.426	0.104	1.74
urban	Deressa et al	2011			0.94	0.32	2.76
urban	Gebeyehu et al	2021			1.16	0.72	1.87
urban	Kumburi et al	2017			1.35	0.93	1.95
urban	Razanamihaja et al	2013			8.41	2.349	30.1
urban	Shibiru et al	2023			1.674	0.96	2.91
Peer pressure	Kumburi et al	2017			1.98	0.66	3.47
Peer pressure	Aboagye et al	2021			3.7	2.31	5.82
Peer pressure	Kassa et al	2016			1.2	0.7	2.1
illegaldrug	Kassa et al (2016)				1.3	0.3	6.8
illegaldrug	Shiferaw et al (2017)				11.55	3.28	40.75
illegaldrug	Peltzer et al (2018)				4.14	2.78	6.14
Family’s cigaresmoking	Teshome et al	2013			1.115	0.739	1.683
Family’s cigaresmoking	TSegay et al	2014			12	10.36	14.73

## Sheet: factors 3
Variables	Author	Year	country	syampling	OR	LCI	UCI
Family’s drinks alcohol	Chekole	2020			1.29	0.89	1.86
Family’s drinks alcohol	Deressa et al	2021			2.6	1.51	4.51
Family’s drinks alcohol	Teshome et al	2013			1.088	0.83	1.44
Family’s drinks alcohol	Gebreslassie et al	2021			2.61	1.56	4.34
Family’s drinks alcohol	Birhanu A	2016			7.83	4.64	13.2
Family’s drinks alcohol	Koura et al	2017			8.3	4.9	14
Family’s drinks alcohol	TSegay et al	2014			1.24	1.17	2.34
Family’s drinks alcohol	Kassa et al	2016			1.2	0.7	2
Family’s drinks alcohol	Reda et al	2012			2.77	1.89	4.07
Family’s drinks alcohol	Razanamihaja et al	2013			3.69	1.423	4.73
Family’s drinks alcohol	Shibiru et al	2023			0.19	0.07	0.51
Khat use	Chekole	2020			1.48	1.05	2.09
Khat use	Deressa et al	2011			15.11	4.24	53.91
Khat use	Gebeyehu et al	2021			4.69	0.89	24.7
Khat use	Gebreslassie et al	2021			2.16	1.28	3.66
Khat use	Yismaw et al	2015			1.18	0.51	2.73
Khat use	Kumburi et al	2017			3.1	0.96	12.14
Khat use	Shiferaw et al	2017			2.78	1.15	6.83
Khat use	Shibiru et al	2023			2.185	0.54	8.86
Khat use	Adere et al	2017			6.97	3.88	12.55
